# Supplementary material for: A dual-functional interlayer for Li–S batteries using carbon fiber film cladded electron-deficient Li2B4O7
Source: Royal Society of Chemistry journal article supplement (doi:10.1039/d2ta04363g), 2022-01-01
Supplement: d2ta04363g1.pdf [file d2ta04363g1.pdf]

Electronic Supplementary Material (ESI) for Journal of Materials Chemistry A.

## A Dual-Functional Interlayer for Li-S Batteries by using Carbon Fiber Film Cladded Electronic-Deficiency $\text{Li}_2\text{B}_4\text{O}_7$

Xin Dai,<sup>a</sup> Kunyang Zou,<sup>a</sup> Weitao Jing,<sup>a</sup> Peng Xu,<sup>b</sup> Junjie Sun,<sup>a</sup> Shengwu Guo,<sup>a</sup> Qiang Tan,<sup>a</sup> Yongning Liu,<sup>a</sup>  
Tengfei Zhou<sup>c\*</sup> and Yuanzhen Chen<sup>a\*</sup>

- a. State Key Laboratory for Mechanical Behavior of Materials, School of Materials Science and Engineering, Xi'an Jiaotong University, Xi'an 710049, P.R. China
- b. Technical Monitoring Center, Petro China Changqing Oil Field Company, Xi'an, 710018, P.R. China
- c. Institutes of Physical Science and Information Technology, Anhui University, Hefei, 230601, P.R. China

\*Corresponding author: [tengfeiz@ahu.edu.cn](mailto:tengfeiz@ahu.edu.cn); [cyz1984@xjtu.edu.cn](mailto:cyz1984@xjtu.edu.cn)

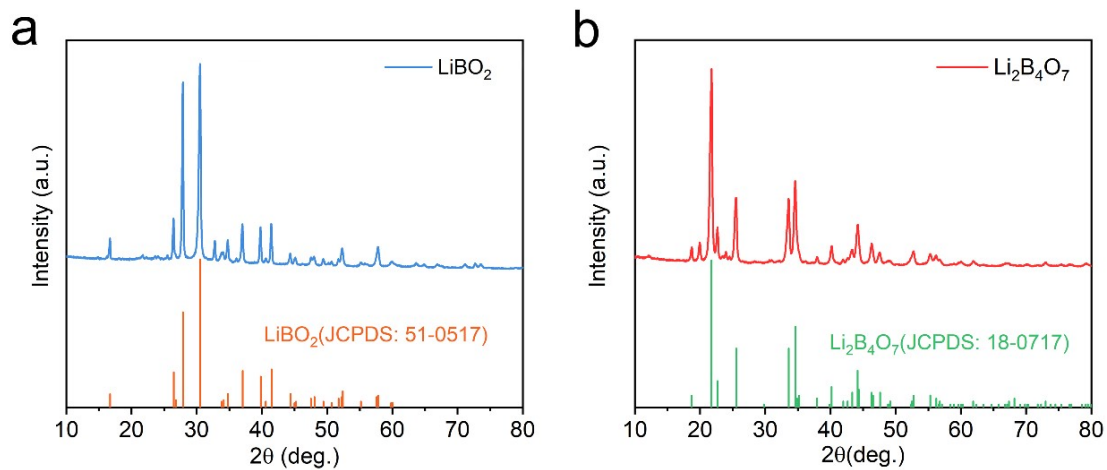

**Fig. S1.** XRD pattern of the (a)  $\text{LiBO}_2$ , which is correspond with the standard PDF card #51-0517, and (b)  $\text{Li}_2\text{B}_4\text{O}_7$ , which matches the standard PDF card #18-0717.

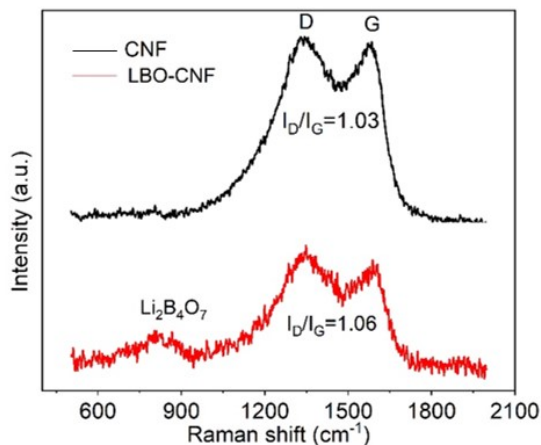

**Fig. S2.** Raman spectra of the CNF and LBO-CNF. The ratio of  $I_D/I_G$  indicates the defects structure of CNF skeleton.

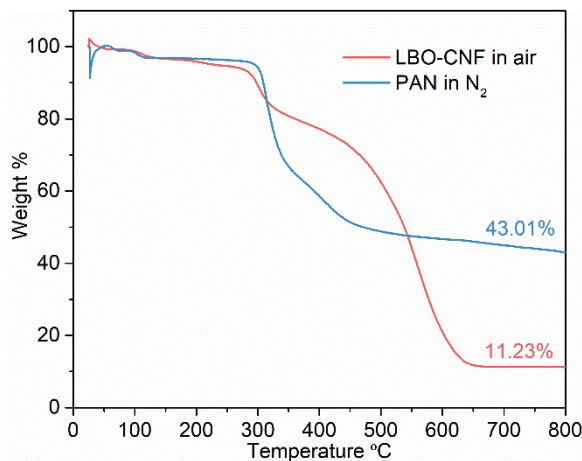

**Fig. S3.** TGA curves of LBO-CNF in air and CNF under nitrogen atmosphere.

The LBO-CNF was derived from LBO-PAN fiber. When the thermogravimetric analysis of LBO-PAN were carried out in air, obviously only LBO left and PAN became CO<sub>2</sub>. Hence the 11.23% indicates the content of LBO in pristine LBO-PAN. When the thermogravimetric analysis of PAN fiber were carried out under nitrogen atmosphere, the PAN fiber will transform into CNF, here 43.01% represents the conversion ratio of the PAN fiber to CNF. Therefore, the content of LBO in LBO-CNF could be calculated as follows:

$$\frac{m_{LBO}}{m_{LBO - CNF}}$$

$$m_{LBO} = 11.23\% m_{LBO - PAN}$$

$$m_{LBO - CNF} = m_{LBO} + m_{CNF}$$

$$m_{CNF} = 43.01\% m_{PAN}$$

$$m_{PAN} = (1 - 11.23\%)m_{LBO - PAN}$$

Thus,

$$\frac{m_{LBO}}{m_{LBO - CNF}} = \frac{11.23\% m_{LBO - PAN}}{11.23\% m_{LBO - PAN} + 43.01\% (1 - 11.23\%)m_{LBO - PAN}} = 22.7\%$$

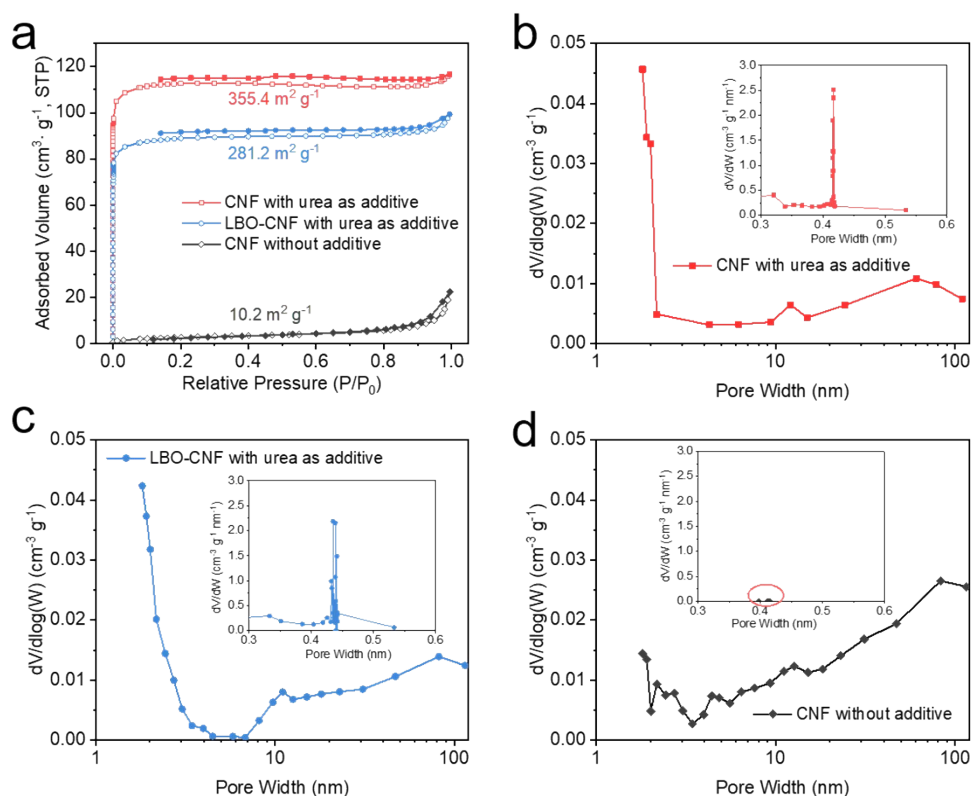

**Fig. S4.** N<sub>2</sub> isothermal adsorption-desorption curves of CNF derived from PAN. BJH pore-size distribution of

(b) CNF with urea, (c) LBO-CNF with urea, and (d) CNF without urea. The inset shows the HK pore-size distribution.

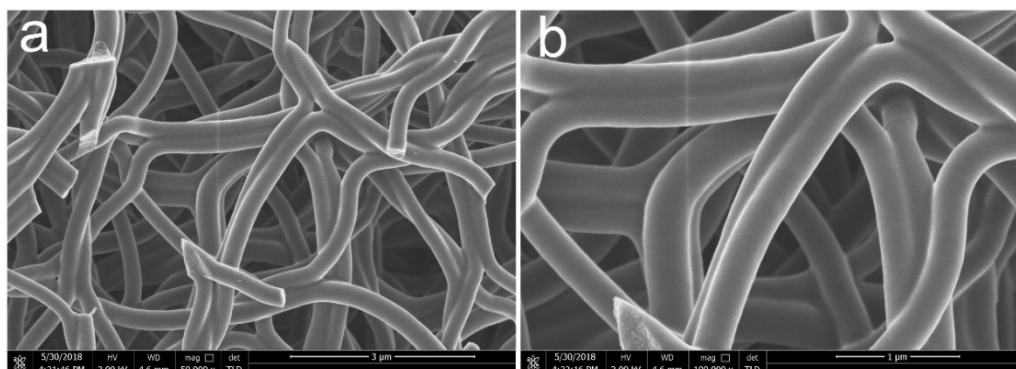

**Fig. S5.** SEM image of the fracture of the CNF. The surface of the CNF is smooth.

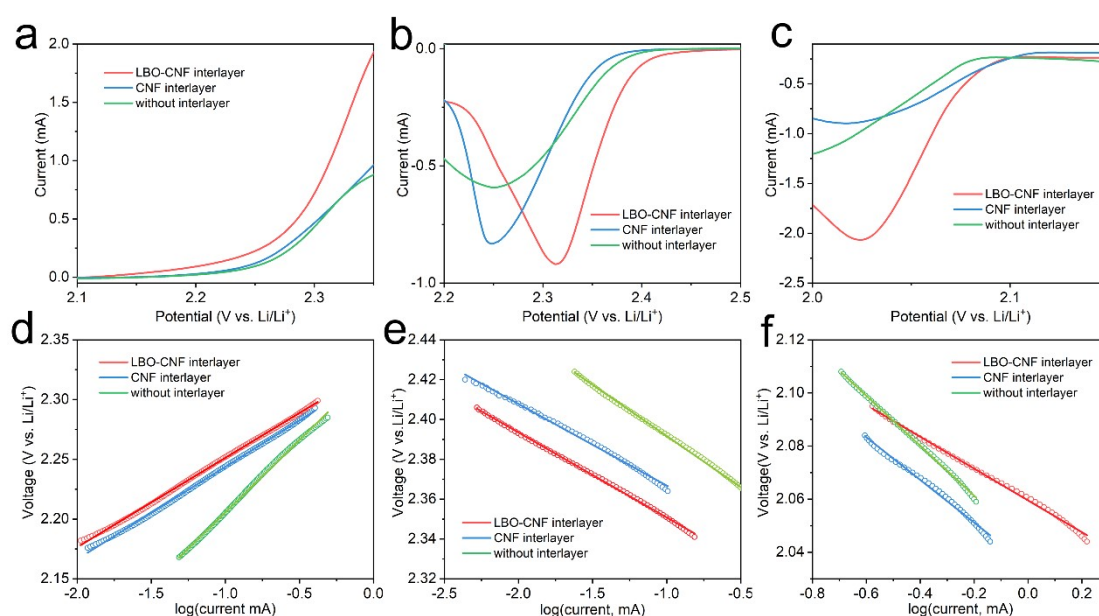

**Fig. S6.** (a-c) The enlarged anodic and cathodic sections of the CV curves. (d-f) Tafel plots derived from the potentiostatic polarization curves. The corresponding values are listed in Table S4.

**Table S1.** Tafel plots derived from the potentiostatic polarization curves of the battery with LBO-CNF, CNF interlayer and without interlayer.

| sample             | Tafel slop (mV dec <sup>-1</sup> ) |            |             |
|--------------------|------------------------------------|------------|-------------|
|                    | anodic                             | cathodic-i | cathodic-ii |
| LBO-CNF            | 0.074E-4                           | 0.041E-4   | 0.059E-4    |
| CNF                | 0.077E-4                           | 0.043E-4   | 0.080E-4    |
| Without interlayer | 0.121E-4                           | 0.051E-4   | 0.094E-4    |

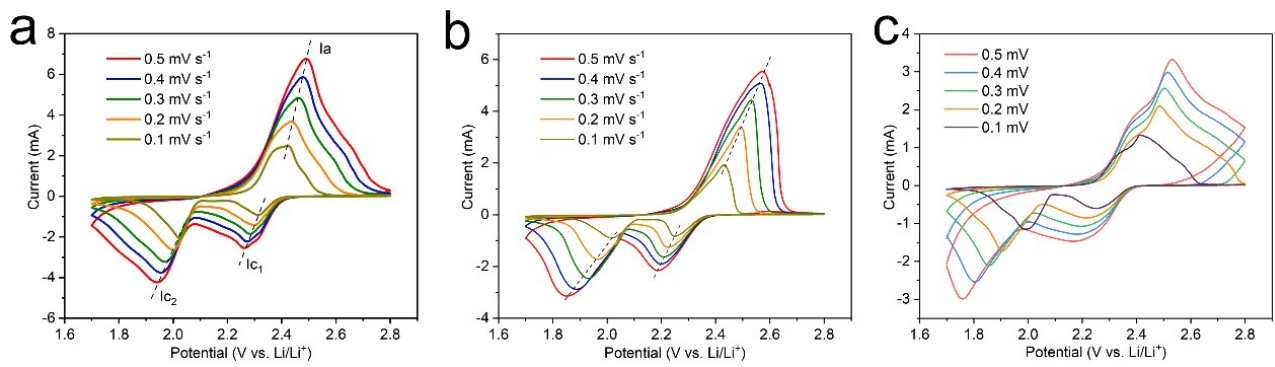

**Fig. S7.** CV curves of (a) LBO-CNF interlayer, (b) CNF interlayer, and (c) without interlayer at different scan rates from 0.1 to 0.5 mV s<sup>-1</sup>.

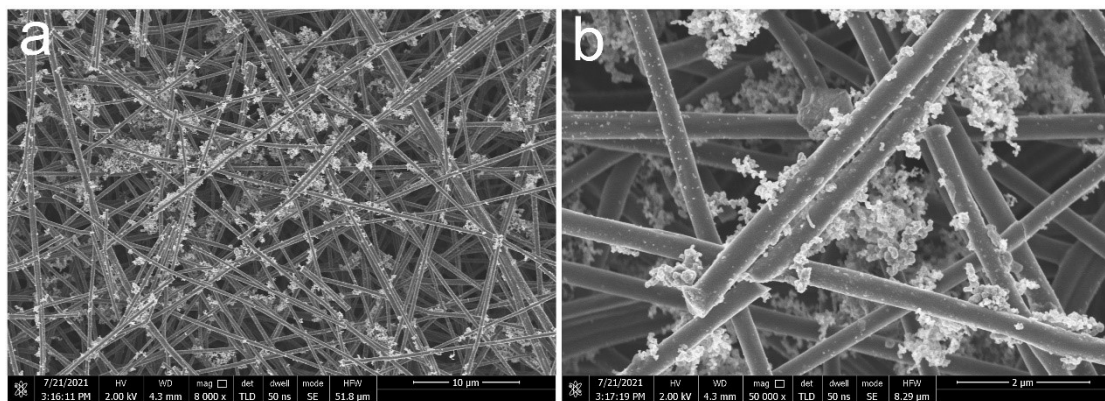

**Fig. S8.** SEM images of the CNF sprayed Acetylene Black nanoparticles.

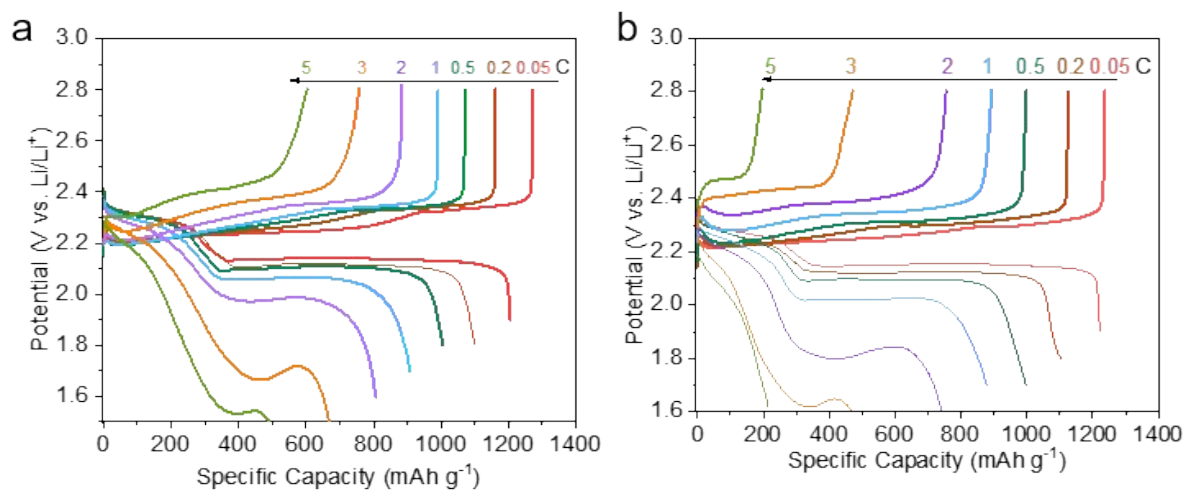

**Fig. S9.** Discharge and charge profiles of Li-S battery at different current rates with (a) CNF interlayer and (b) without interlayer.

**Table S2.** The fitting results of the equivalent circle of the fresh batteries with LBO-CNF, CNF interlayer and without interlayer.

| sample             | Impedance (ohm) |          |
|--------------------|-----------------|----------|
|                    | $R_e$           | $R_{ct}$ |
| LBO-CNF            | 2.9             | 90.8     |
| CNF                | 1.3             | 109.2    |
| Without interlayer | 4.8             | 122.8    |

**Table S3.** The fitting results of the equivalent circle of the cycled cells with LBO-CNF, CNF interlayer and without interlayer.

| sample             | Impedance (ohm) |          |           |
|--------------------|-----------------|----------|-----------|
|                    | $R_e$           | $R_{ct}$ | $R_{SEI}$ |
| LBO-CNF            | 2.3             | 9.8      | 7.1       |
| CNF                | 3.2             | 20.6     | 8.5       |
| Without interlayer | 3.1             | 38.6     | 11.6      |

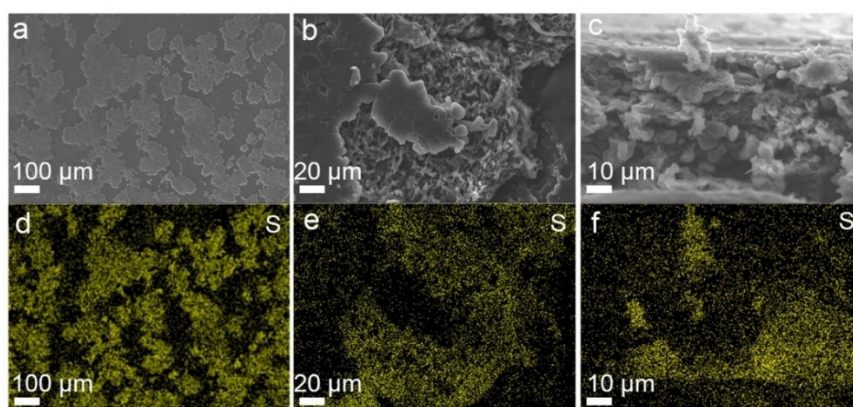

**Fig. S10.** SEM images and relative EDX mapping of lithium of the disassembled Li-S batteries without interlayer. (a-c) top view, (d-f) top view enlarged, and (g-i) side view.

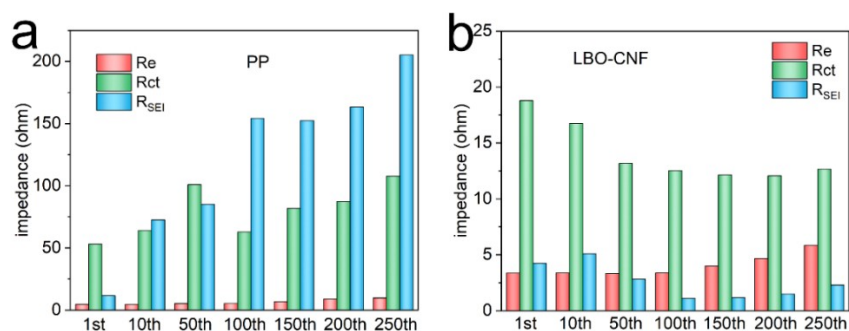

**Fig. S11.** EIS fitting values of Li-S battery (a) without interlayer and (b) with LBO-CNF interlayer at different cycle.

**Table S4.** The fitting results of the equivalent circle of the battery without interlayer at different cycles at 0.2 C.

| cycle | Impedance (ohm) |          |           |
|-------|-----------------|----------|-----------|
|       | $R_e$           | $R_{ct}$ | $R_{SEI}$ |
| 1st   | 4.7             | 53.2     | 11.6      |
| 10th  | 4.6             | 63.7     | 72.6      |
| 50th  | 5.3             | 100.9    | 85.2      |
| 100th | 5.4             | 62.8     | 154.3     |
| 150th | 6.7             | 81.9     | 152.5     |
| 200th | 8.9             | 87.4     | 163.4     |
| 250th | 9.8             | 107.8    | 205.2     |

**Table S5.** The fitting results of the equivalent circle of the battery with LBO-CNF interlayer at different cycles at 0.2 C.

| cycle | Impedance (ohm) |          |           |
|-------|-----------------|----------|-----------|
|       | $R_e$           | $R_{ct}$ | $R_{SEI}$ |
| 1st   | 3.3             | 18.8     | 4.3       |
| 10th  | 3.4             | 16.7     | 5.1       |
| 50th  | 3.3             | 13.2     | 2.8       |
| 100th | 3.4             | 12.5     | 1.1       |
| 150th | 4.1             | 12.2     | 1.2       |
| 200th | 4.7             | 12.1     | 1.5       |
| 250th | 5.8             | 12.6     | 2.3       |

**Table S6.** The content of sulfur in the cathode and with interlayer included.

| Sulfur loading<br>( $\text{mg cm}^{-2}$ ) | Interlayer<br>( $\text{mg cm}^{-2}$ ) | Sulfur content in the<br>cathode | Sulfur content with<br>interlayer included |
|-------------------------------------------|---------------------------------------|----------------------------------|--------------------------------------------|
| ~ 1.8                                     | ~ 0.54                                | 65%                              | 54.4%                                      |
| ~ 2.5                                     | ~ 0.54                                | 65%                              | 57.0%                                      |
| ~ 3.5                                     | ~ 0.54                                | 65%                              | 59.1%                                      |
